# Supplementary material for: Quantitative analysis of the synergistic effect of Au nanoparticles on SnO2–rGO nanocomposites for room temperature hydrogen sensing
Source: Royal Society of Chemistry journal article supplement (doi:10.1039/d0cp05701k), 2021-01-01
Supplement: d0cp05701k1.pdf [file d0cp05701k1.pdf]

# Supporting Information

## **Quantitative analysis of the synergistic effect of Au nanoparticles on SnO<sub>2</sub>- Quantitative analysis of the synergistic effect of Au nanoparticles on SnO<sub>2</sub>-rGO nanocomposites for room temperature hydrogen sensing**

Yale Wang,<sup>1</sup> Haihui Pu,<sup>1</sup> Ganhua Lu,<sup>1</sup> Xiaoyu Sui,<sup>1</sup> Junhong Chen<sup>1,2,3\*</sup>

<sup>1</sup> Department of Mechanical Engineering, University of Wisconsin-Milwaukee, 3200 North Cramer Street, Milwaukee, WI 53211, USA

<sup>2</sup>Current address: Pritzker School of Molecular Engineering, University of Chicago, 5640 S. Ellis Ave, Chicago, Illinois 60637, USA.

<sup>3</sup>Current address: Chemical Sciences and Engineering Division, Physical Sciences and Engineering Directorate, Argonne National Laboratory, 9700 S. Cass Ave, Lemont, Illinois 60439, USA.

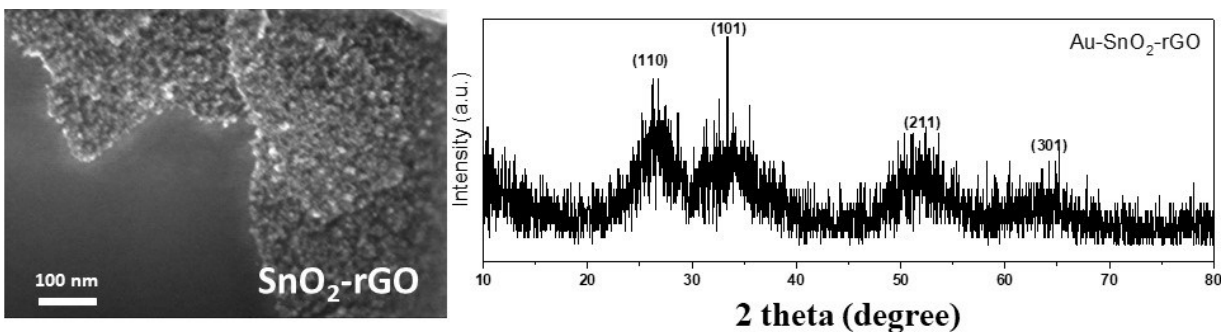

Figure S1. SEM image of SnO<sub>2</sub>-rGO and XRD pattern of Au-SnO<sub>2</sub>-rGO.

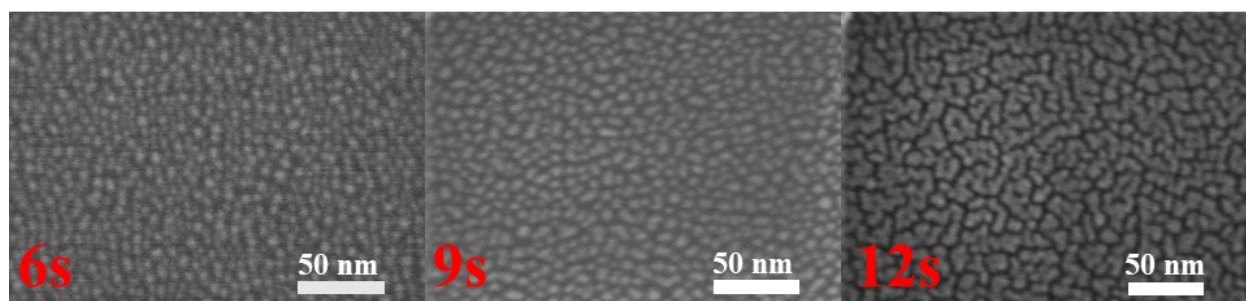

Figure S2. SEM images of sputtered gold nanoparticles on the silicon wafer with different sputtering time.

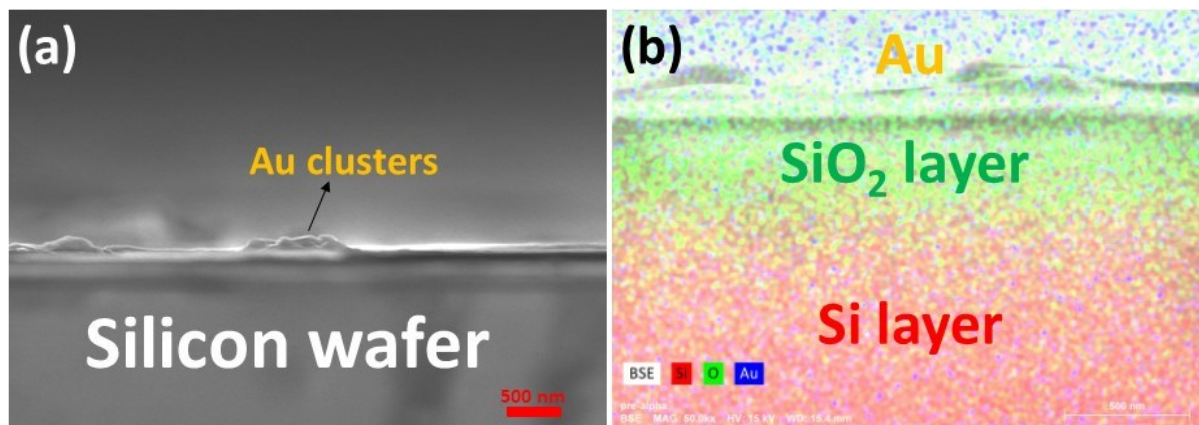

Figure S3. a) SEM side view image of the sensor chip with sputtered gold, b) EDX mapping results of the prepared sensor chip.

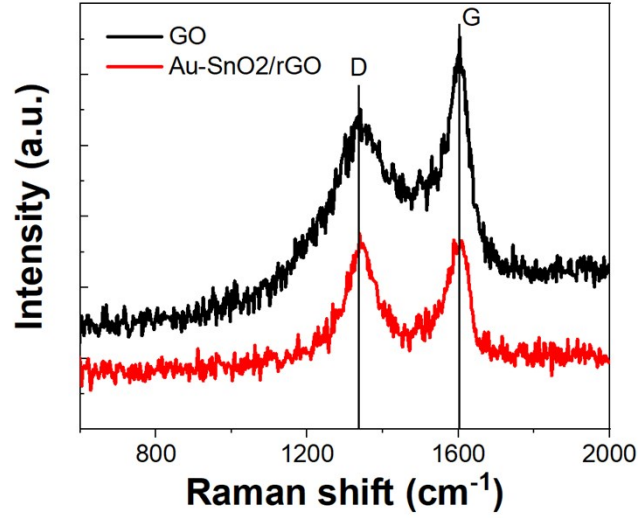

Figure S4. Raman spectral of GO and Au-SnO<sub>2</sub>/rGO samples.

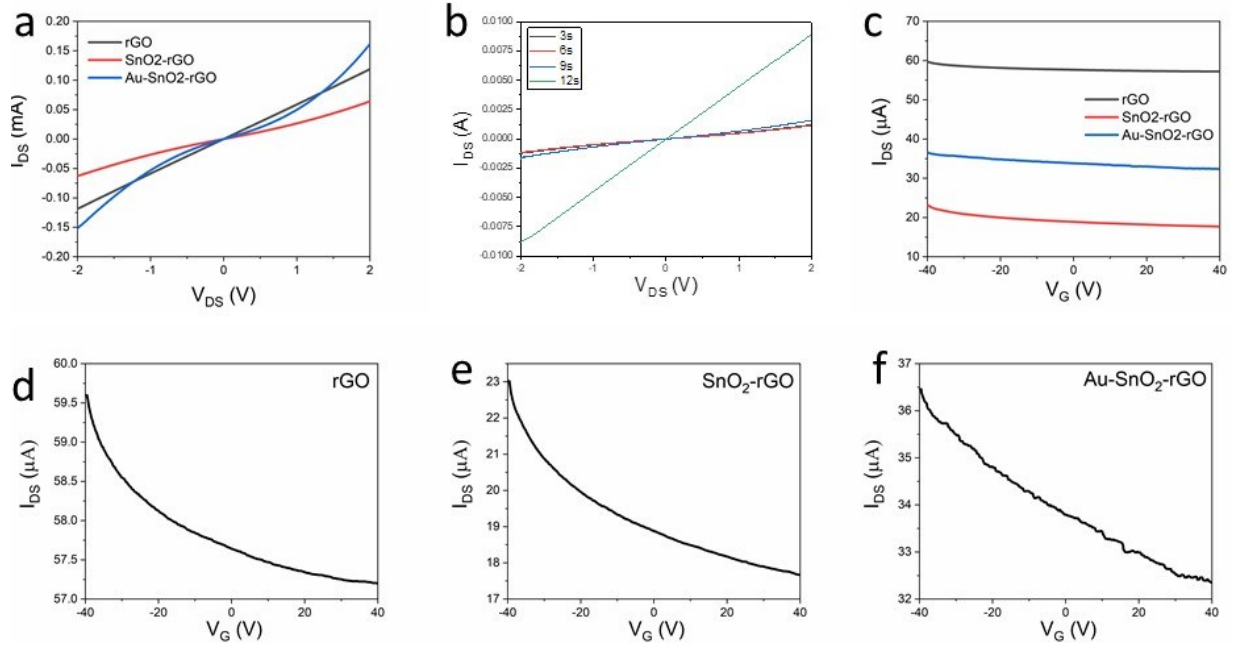

Figure S5. a-b) I-V curves and c-f) FET curves of the rGO, SnO<sub>2</sub>-rGO, and Au-SnO<sub>2</sub>/rGO sensors.

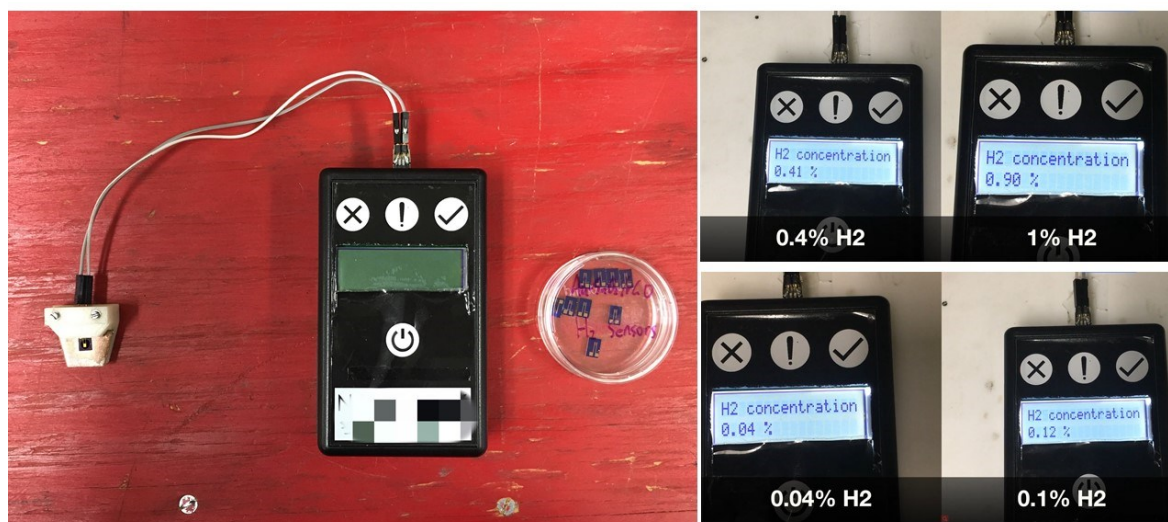

Figure

e S6. Prototype handheld device with the demonstration results.

Table S1. Quantitative Atomic ratio (%) analysis on the sputtered gold EDS results

| Element | Si    | O     | Au   | C    |
|---------|-------|-------|------|------|
| 6s      | 61.82 | 29.61 | 0.05 | 8.51 |
| 9s      | 61.44 | 29.36 | 0.06 | 9.14 |
| 12s     | 63.15 | 29.72 | 0.08 | 7.05 |

Table S2. Comparison between the reported room temperature hydrogen sensors and our Au-SnO<sub>2</sub>/rGO device

| Ref              | Sensing Material                      | H <sub>2</sub> % | Response ( $\Delta R/R_0$ ) % | Response time (sec.) | Recovery time (sec.) | Temperature |
|------------------|---------------------------------------|------------------|-------------------------------|----------------------|----------------------|-------------|
| 1                | Pt-SnO <sub>2</sub> /rGO              | 1                | 200 in 1.5mins                | 4                    | 3                    | 50          |
| 2                | Pd-MLGN                               | 0.8              | ~70                           | ~5                   | ~300                 | RT          |
| 3                | Pd nanowires                          | 1                | 5.9                           | 16                   | ~50                  | RT          |
| 4                | PMMA-Pd-G                             | 1                | 46                            | ~60                  | ~600                 | RT          |
| 5                | Pd/SnO <sub>2</sub> /rGO              | 1                | 55                            | >100                 | >1800                | RT          |
| 6                | Pd@ZIF-8                              | 1                | 3                             | 8                    | 10                   | RT          |
| 7                | Pd-SnO <sub>2</sub> /MoS <sub>2</sub> | 0.5              | 18                            | <30                  | <20                  | RT          |
| <b>This work</b> | <b>Au-SnO<sub>2</sub>/rGO</b>         | <b>1</b>         | <b>47</b>                     | <b>60</b>            | <b>180</b>           | <b>RT</b>   |

\*The hydrogen exposure time for response % calculation are all converted to 5 mins, response time was defined as the time length to reach 90% of the total response in 5mins, recovery time was defined as the time over which 90% of the maximum response % is recovered.

## References

1. P. A. Russo, N. Donato, S. G. Leonardi, S. Baek, D. E. Conte, G. Neri and N. Pinna, *Angew Chem Int Ed Engl*, 2012, **51**, 11053-11057.
2. J. L. Johnson, A. Behnam, S. J. Pearton and A. Ural, *Adv Mater*, 2010, **22**, 4877-4880.
3. X. Q. Zeng, M. L. Latimer, Z. L. Xiao, S. Panuganti, U. Welp, W. K. Kwok and T. Xu, *Nano Lett*, 2011, **11**, 262-268.
4. J. Hong, S. Lee, J. Seo, S. Pyo, J. Kim and T. Lee, *ACS Appl Mater Interfaces*, 2015, **7**, 3554-3561.
5. Y. Peng, L. Zheng, K. Zou and C. Li, *Nanotechnology*, 2017, **28**, 215501.
6. W. T. Koo, S. Qiao, A. F. Ogata, G. Jha, J. S. Jang, V. T. Chen, I. D. Kim and R. M. Penner, *ACS Nano*, 2017, **11**, 9276-9285.
7. D. Zhang, Y. e. Sun, C. Jiang and Y. Zhang, *Sensors and Actuators B: Chemical*, 2017, **242**, 15-24.
